# Supplementary material
Source: ML conference proceedings conference paper supplement (https://proceedings.neurips.cc/paper_files/paper/2023/hash/694be3548697e9cc8999d45e8d16fe1e-Abstract.html)
Supplement: Supplementary file 1 [file 694be3548697e9cc8999d45e8d16fe1e-Supplemental-Conference.pdf]

## 511 **6 Appendix**

512 In this appendix, we examine the extrapolation ability of **HGRN** and provide the training and  
513 inference speed comparison of **HGRN** and existing efficient sequence modeling methods. We also  
514 illustrate the forget rates of each layer on a trained language model of **HGRN**.

### 515 **6.1 Extrapolation test**

516 In this section, we tested **HGRN**'s extrapolation ability by directly inferring the model with a variety  
517 of sequence lengths. As shown in Table 9, our method has the ability to train short and test long.

### 518 **6.2 Speed comparison**

519 In this section, we benchmark the speed of our method on the LRA benchmark. Our method achieves  
520 state-of-the-art training and inference speed.

### 521 **6.3 Visualization**

522 In this section, we visualize the forget rates (decay rates) of each layer on a model trained on language  
523 modeling tasks.

Figure 4: Visualization forget rates (decay rates) in each layer.

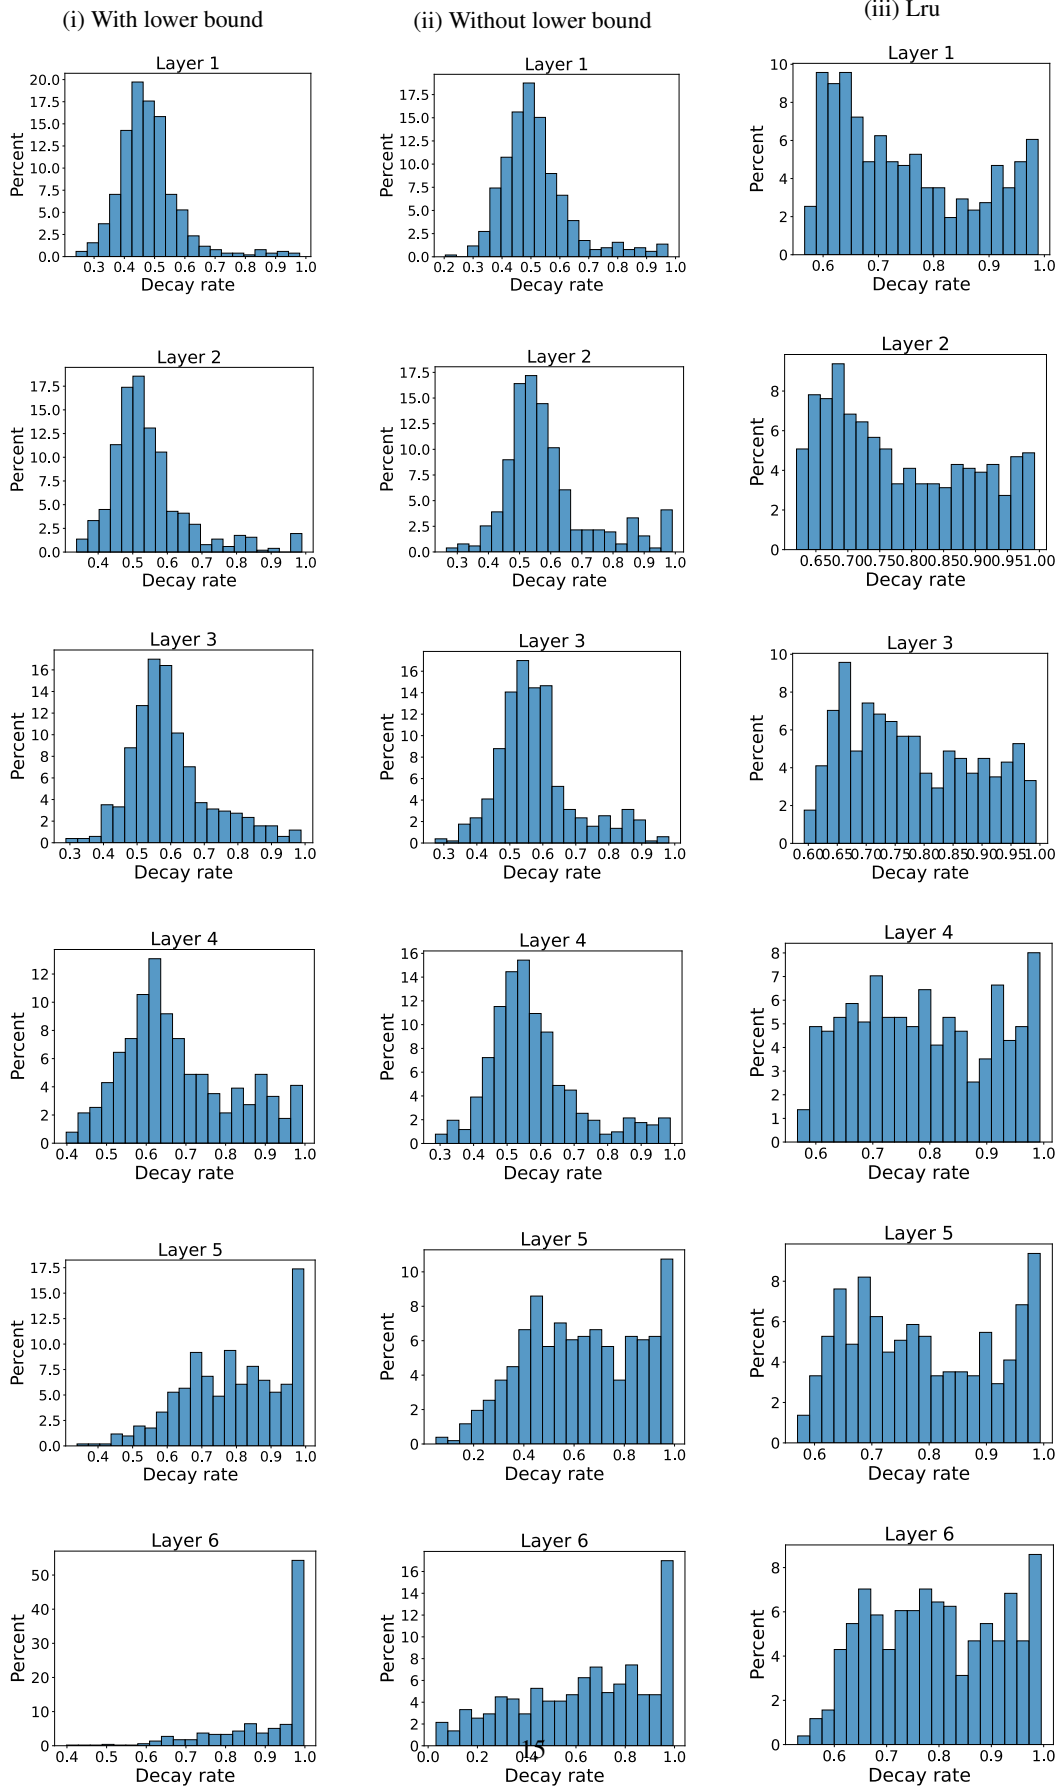

Table 9: The extrapolation performance of competing methods. The best result is highlighted in **bold** and the second in underline. ↓ means *lower is better*.

| SeqLen | Transformer<br>PPL↓ | LS<br>PPL↓ | FLASH<br>PPL↓ | l+elu<br>PPL↓ | Performer<br>PPL↓ | cosFormer<br>PPL↓ | gMLP<br>PPL↓ | S4<br>PPL↓ | DSS<br>PPL↓ | GSS<br>PPL↓ | ALiBi<br>PPL↓ | TNN<br>PPL↓ | LRU<br>PPL↓ | HGRU<br>PPL↓ |
|--------|---------------------|------------|---------------|---------------|-------------------|-------------------|--------------|------------|-------------|-------------|---------------|-------------|-------------|--------------|
| 512    | 24.78               | 24.05      | 24.69         | 28.05         | 63.16             | 27.06             | 29.13        | 30.74      | 41.07       | 39.66       | 24.15         | 24.67       | 31.12       | 24.85        |
| 768    | 41.36               | 23.49      | 16950.45      | 47.35         | 159.74            | 32.90             | 1.34E+9      | 30.41      | 40.50       | 39.76       | 23.38         | 24.25       | 30.72       | 24.4         |
| 1024   | 62.35               | 23.21      | 174165.47     | 70.47         | 504.30            | 55.28             | 8.93E+12     | 30.24      | 40.22       | 39.91       | 22.98         | 24.05       | 30.5        | 24.16        |
| 1280   | 82.52               | 23.07      | 346502.88     | 91.88         | 1020.28           | 102.88            | 1.58E+15     | 30.15      | 40.03       | 40.82       | 22.74         | 23.91       | 30.38       | 24.03        |
| 1536   | 100.17              | 22.97      | 647788.12     | 111.56        | 1568.83           | 175.26            | 4.96E+16     | 30.08      | 39.94       | 41.04       | 22.57         | 23.83       | 30.3        | 23.94        |
| 1792   | 118.42              | 22.97      | 1719873.5     | 129.92        | 2138.50           | 267.65            | 5.67E+17     | 30.04      | 39.85       | 41.08       | 22.52         | 23.79       | 30.24       | 23.88        |
| 2048   | 133.44              | 22.99      | 6.25E+6       | 147.09        | 2693.89           | 368.02            | 3.59E+18     | 30.00      | 39.79       | 41.53       | 22.43         | 23.73       | 30.19       | 23.82        |
| 3072   | 188.95              | 23.25      | 4.17E+10      | 206.88        | 4945.82           | 820.77            | 2.19E+20     | 29.91      | 39.64       | 44.08       | 22.24         | 23.63       | 30.09       | 23.71        |
| 4096   | 246.06              | 23.83      | 2.67E+13      | 267.87        | 7170.91           | 1335.51           | 1.61E+21     | 29.88      | 39.59       | 48.27       | 22.17         | 23.58       | 30.04       | 23.66        |
| 5120   | 270.93              | 24.56      | 1.26E+15      | 299.31        | 8443.15           | 1735.50           | 5.08E+21     | 29.85      | 39.54       | 53.32       | 22.11         | 23.54       | 30.01       | 23.62        |
| 6144   | 311.65              | 25.45      | 1.58E+16      | 352.62        | 10234.07          | 2146.19           | 1.16E+22     | 29.83      | 39.51       | 57.73       | 22.08         | 23.53       | 29.99       | 23.6         |
| 7168   | 346.58              | 26.42      | 8.11E+16      | 389.02        | 11420.56          | 2494.79           | 1.98E+22     | 29.82      | 39.49       | 60.25       | 22.07         | 23.51       | 29.97       | 23.58        |
| 8192   | 372.18              | 27.11      | 3.40E+17      | 411.50        | 12557.09          | 2902.24           | 2.78E+22     | 29.82      | 39.49       | 63.36       | 22.05         | 23.51       | 29.97       | 23.58        |
| 9216   | 387.29              | 28.78      | 1.22E+18      | 453.27        | 14847.66          | 3028.72           | 3.93E+22     | 29.80      | 39.46       | 74.92       | 22.03         | 23.49       | 29.96       | 23.56        |
| 10240  | 395.94              | 30.13      | 4.03E+18      | 457.06        | 13623.83          | 3247.83           | 4.93E+22     | 29.79      | 39.45       | 81.87       | 22.02         | 23.48       | 29.94       | 23.55        |
| 11264  | 426.54              | 31.14      | 1.07E+19      | 504.19        | 14661.77          | 3341.91           | 5.70E+22     | 29.79      | 39.46       | 87.67       | 22.00         | 23.48       | 29.94       | 23.55        |
| 12288  | 463.50              | 33.21      | 2.52E+19      | 555.38        | 17959.85          | 3644.81           | 7.18E+22     | 29.79      | 39.44       | 92.11       | 22.00         | 23.48       | 29.94       | 23.55        |
| 13312  | 506.35              | 34.72      | 4.96E+19      | 584.01        | 20026.35          | 3851.70           | 8.04E+22     | 29.78      | 39.43       | 96.00       | 22.00         | 23.47       | 29.93       | 23.54        |
| 14336  | 486.86              | 36.05      | 1.28E+20      | 589.83        | 20971.31          | 3951.26           | 9.41E+22     | 29.78      | 39.43       | 101.47      | 21.99         | 23.46       | 29.92       | 23.53        |
| Avg    | 261.36              | 26.71      | 1.16E+19      | 299.86        | 8684.79           | 1764.75           | 2.41E+22     | 29.97      | 39.75       | 60.26       | <b>22.40</b>  | 23.70       | 30.17       | 23.80        |

Table 10: Speed comparison on LRA benchmark. The 1K,...,5K represent the input sequence length. We mark it with - if a method is out of memory. The higher the better for all metrics.

| Method           | Train Speed(steps per second)↑ |       |       |      |      | Inference Speed(steps per second)↑ |       |       |       |       |
|------------------|--------------------------------|-------|-------|------|------|------------------------------------|-------|-------|-------|-------|
|                  | 1K                             | 2K    | 3K    | 4K   | 5K   | 1K                                 | 2K    | 3K    | 4K    | 5K    |
| Transformer [64] | 13.58                          | 4.84  | -     | -    | -    | 23.67                              | 8.22  | -     | -     | -     |
| Performer [27]   | 18.40                          | 10.77 | 7.66  | 6.30 | 5.64 | 30.04                              | 17.36 | 12.80 | 10.55 | 9.52  |
| LS [71]          | 20.29                          | 11.24 | 8.05  | 6.51 | 5.89 | 39.05                              | 21.11 | 15.02 | 12.6  | 11.66 |
| Fnet [30]        | 25.19                          | 15.62 | 11.24 | 9.41 | 8.18 | 48.81                              | 27.89 | 19.52 | 16.27 | 14.46 |
| cosFormer [49]   | 22.00                          | 12.80 | 9.47  | 7.93 | 7.13 | 39.05                              | 22.31 | 16.62 | 13.95 | 12.60 |
| S4 [17]          | 13.13                          | 7.33  | 4.91  | 3.84 | 3.04 | 30.04                              | 16.27 | 10.85 | 8.58  | 6.79  |
| FLASH [23]       | 17.36                          | 9.03  | 6.54  | 5.19 | 4.68 | 30.04                              | 15.94 | 11.32 | 9.19  | 8.40  |
| TNN [47]         | 17.55                          | 9.89  | 6.79  | 5.68 | 4.54 | 33.96                              | 17.75 | 12.40 | 10.28 | 8.22  |
| <b>HGRU</b>      | 22.31                          | 13.58 | 9.52  | 7.40 | 7.44 | 43.39                              | 25.19 | 16.62 | 14.20 | 13.95 |
